# Supplementary material for: Deep Learning-Based Classification of Uterine Cervical and Endometrial Cancer Subtypes from Whole-Slide Histopathology Images
Source: MDPI journal article supplement (doi:10.3390/diagnostics12112623), 2022-10-28
Supplement: s1 [file s1]

**Supplementary Table S1-1.** Numbers of tissue image patches for the normal/tumor tissue classifiers. Training epoch was also presented.

|           | Number of normal image patches | Number of tumor image patches | Training epoch |
|-----------|--------------------------------|-------------------------------|----------------|
| TCGA-CESC | 539,817                        | 683,291                       | 16             |
| TCGA-UCEC | 613,784                        | 736,988                       | 13             |

**Supplementary Table S1-2.** Average numbers of tissue image patches in each training fold for the five-fold cross validation scheme to train the classifiers for the subtypes and origin of cancers. The average training epoch was also presented.

|                                            |                                                                  |                                                                  |                        |
|--------------------------------------------|------------------------------------------------------------------|------------------------------------------------------------------|------------------------|
| Cervical cancer subtypes classification    | Average patch number for cervical squamous cell carcinoma        | Average patch number for endocervical adenocarcinoma             | Average training epoch |
|                                            | 117,438                                                          | 78,465                                                           | 18                     |
| Endometrial cancer subtypes classification | Average patch number for endometrioid endometrial adenocarcinoma | Average patch number for serous endometrial adenocarcinoma       | Average training epoch |
|                                            | 387,155                                                          | 264,531                                                          | 13                     |
| Tumor origin classification                | Average patch number for endocervical adenocarcinoma             | Average patch number for endometrioid endometrial adenocarcinoma | Average training epoch |
|                                            | 78,465                                                           | 118,197                                                          | 14                     |
