# Supplementary material for: Deep Learning-Based Classification of Uterine Cervical and Endometrial Cancer Subtypes from Whole-Slide Histopathology Images
Source: MDPI journal article supplement (doi:10.3390/diagnostics12112623), 2022-10-28

**Supplementary Figure S1.** Schematic view of the network structure for the classification of tissue subtypes. First, whole slide images were tessellated into 360×360 pixel image patches. Then, the image patches were provided as inputs to the Inception v3 network for classification. The last layer of the Inception v3 network is a softmax layer for 2-class classification in the present study.

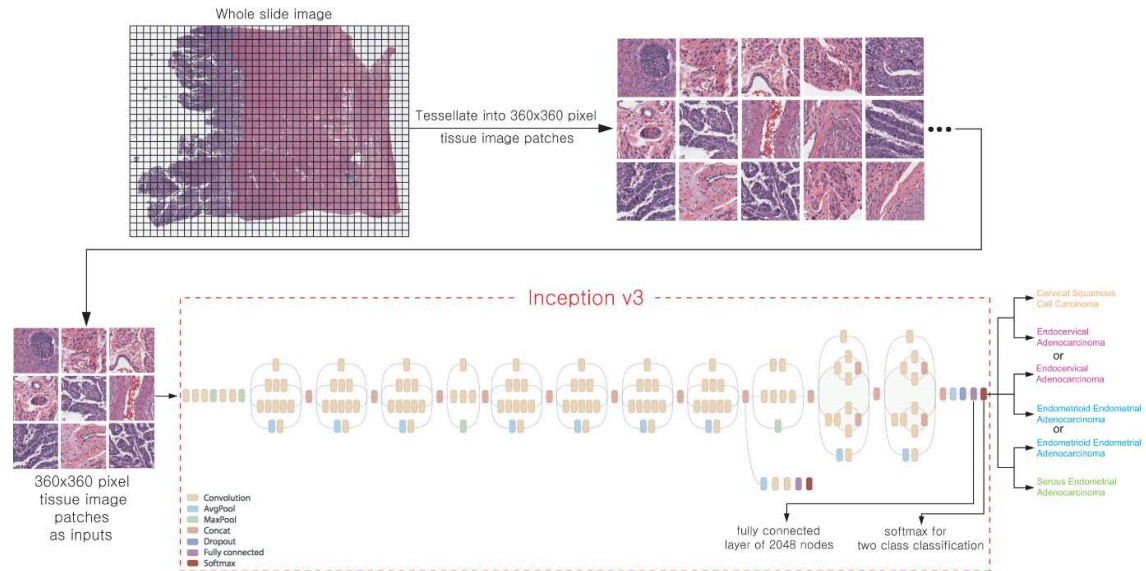

Supplement: s1 [file s1]
